# Supplementary material for: ZIP4, a Novel Determinant of Tumor Invasion in Hepatocellular Carcinoma, Contributes to Tumor Recurrence after Liver Transplantation
Source: PubMed Central journal article supplement — Int J Biol Sci. 2014 Feb 11;10(3):245–56. doi: 10.7150/ijbs.7401 (PMC3957080; doi:10.7150/ijbs.7401), 2014-02-11
Supplement: ijbsv10p0245s1.pdf [file ijbsv10p0245s1.pdf]

**Supplemental Table 1. Correlation between ZIP4 positive density cell and clinicopathologic characteristics**

| Characteristics       | ZIP4 positive cell density of cells (%) |            | <i>P</i> |
|-----------------------|-----------------------------------------|------------|----------|
|                       | Low(n=20)                               | High(n=40) |          |
| Age(years)            |                                         |            | 1.000    |
| <50                   | 9(45%)                                  | 18(45%)    |          |
| ≥50                   | 11(55%)                                 | 22(55%)    |          |
| Sex                   |                                         |            | 1.000    |
| Male                  | 19                                      | 39         |          |
| Female                | 1                                       | 1          |          |
| Tumor size(cm)        |                                         |            | 0.022    |
| <5                    | 11(55%)                                 | 10(25%)    |          |
| ≥5                    | 9(45%)                                  | 30(75%)    |          |
| Tumor number          | /                                       |            | 0.041    |
| Single                | 13(65%)                                 | 14(35%)    |          |
| Multiple              | 7(35%)                                  | 24(65%)    |          |
| Distant metastasis    |                                         |            | 0.530    |
| Yes                   | 0(0%)                                   | 3(7.5%)    |          |
| No                    | 20(100%)                                | 37(92.5%)  |          |
| Tumor recurrence      |                                         |            | 0.033    |
| Yes                   | 3(15%)                                  | 17(42.5%)  |          |
| No                    | 17(85%)                                 | 23(57.5%)  |          |
| Tumor differentiation |                                         |            | 0.714    |
| I                     | 10(50%)                                 | 22(55%)    |          |
| II-III                | 10(50%)                                 | 18(45%)    |          |
| Liver cirrhosis       |                                         |            | 0.903    |
| Yes                   | 16(80%)                                 | 34(85%)    |          |
| No                    | 4(20%)                                  | 6(15%)     |          |
| History of hepatitis  |                                         |            | 0.502    |
| Yes                   | 16(80%)                                 | 36(90%)    |          |
| No                    | 4(20%)                                  | 4(10%)     |          |
| HBsAg                 |                                         | /          | 1.000    |
| Negative              | 15(75%)                                 | 30(75%)    |          |
| Positive              | 5(25%)                                  | 10(25%)    |          |
| AFP level(ng/mL)      |                                         |            | 0.791    |
| ≤400                  | 15(75%)                                 | 28(70%)    |          |
| >400                  | 4(20%)                                  | 11(27.5%)  |          |
| AFP level(ng/mL)      |                                         |            | 0.588    |
| ≤20                   | 5(25%)                                  | 13(32.5%)  |          |
| >20                   | 14(70%)                                 | 26(65%)    |          |
| γ GT level            |                                         |            | 0.829    |
| Normal                | 5(25%)                                  | 9(22.5%)   |          |
| Abnormal              | 15(75%)                                 | 31(77.5%)  |          |

|                  |         |           |       |
|------------------|---------|-----------|-------|
| CEA level        |         |           | 1.000 |
| Normal           | 16(80%) | 34(85%)   |       |
| Abnormal         | 2(10%)  | 4(10%)    |       |
| CHE level        |         |           | 0.713 |
| Normal           | 8(40%)  | 18(45%)   |       |
| Abnormal         | 12(60%) | 22(55%)   |       |
| Ascites          |         |           | 0.022 |
| Yes              | 5(25%)  | 1(2.5%)   |       |
| no               | 15(75%) | 39(97.5%) |       |
| TBIL level       |         |           | 0.550 |
| Normal           | 5(25%)  | 13(32.5%) |       |
| Abnormal         | 15(75%) | 27(67.5%) |       |
| ALB level        |         |           | 0.273 |
| Normal           | 8(40%)  | 22(55%)   |       |
| Abnormal         | 12(60%) | 18(45%)   |       |
| PT time          |         |           | 0.197 |
| Normal           | 9(45%)  | 25(62.5%) |       |
| Abnormal         | 11(55%) | 15(37.5%) |       |
| INR level        |         |           | 1.000 |
| Normal           | 7(35%)  | 14(35%)   |       |
| Abnormal         | 13(65%) | 26(65%)   |       |
| Serum creatinine |         |           | 0.713 |
| Normal           | 8(40%)  | 18(45%)   |       |
| Abnormal         | 12(60%) | 22(55%)   |       |
| ALT level        |         |           | 0.043 |
| Normal           | 9(45%)  | 8(20%)    |       |
| Abnormal         | 11(55%) | 32(80%)   |       |
| DBIL level       |         |           | 0.846 |
| Normal           | 7(35%)  | 13(32.5%) |       |
| Abnormal         | 13(65%) | 27(67.5%) |       |
| TNM stage        |         |           | 0.044 |
| I+II             | 13(65%) | 15(37.5%) |       |
| III+IV           | 7(35%)  | 25(62.5%) |       |
| CTP              |         |           | 0.042 |
| A                | 12(60%) | 13(32.5%) |       |
| B/C              | 8(40%)  | 27(67.5%) |       |

Abbreviation: ALT: alanine aminotransferase; CTP Child–Turcotte–Pugh scores. AFP: alpha fetoprotein;  $\gamma$ GT:  $\gamma$ - glutamyl transferase; CEA: carcinoembryonic antigen; CHE: cholinesterase; TBIL: total bilirubin; ALB: Serum albumin; PT: prothrombintime; INR: International Normalized Ratio; ALT: alanine aminotransferase; DBIL: bilirubin

direct.

Chi-square tests for all other analyses.
